# Supplementary material
Source: PubMed Central journal article supplement (PMC7554230)
Supplement: NIHMS1625962-supplement-Suppl_Material.pdf [file NIHMS1625962-supplement-Suppl_Material.pdf]

## Supporting Information

### **Outer Membranes of Polymyxin-Resistant *Acinetobacter baumannii* with Phosphoethanolamine-modified Lipid A and Lipopolysaccharide Loss Display Different Atomic-Scale Interactions with Polymyxins**

Xukai Jiang<sup>1</sup>, Kai Yang<sup>2</sup>, Mei-Ling Han<sup>1</sup>, Bing Yuan<sup>2</sup>, Jingliang Li<sup>3</sup>, Bin Gong<sup>4</sup>, Tony Velkov<sup>5</sup>, Falk Schreiber<sup>6</sup>, Lushan Wang<sup>7</sup>, and Jian Li<sup>1,\*</sup>

<sup>1</sup>Biomedicine Discovery Institute, Infection & Immunity Program, Department of Microbiology, Monash University, Melbourne, VIC 3800, Australia

<sup>2</sup>Center for Soft Condensed Matter Physics and Interdisciplinary Research, School of Physical Science and Technology, Soochow University, Suzhou, 215006, China

<sup>3</sup>Institute for Frontier Materials, Deakin University, Geelong, VIC 3217, Australia

<sup>4</sup>School of Software, Shandong University, Jinan, 250101, China

<sup>5</sup>Department of Pharmacology & Therapeutics, University of Melbourne, Melbourne, VIC 3010, Australia

<sup>6</sup>Department of Computer and Information Science, University of Konstanz, Konstanz, 78467, Germany

<sup>7</sup>State Key Laboratory of Microbial Technology, Shandong University, Qingdao, 266237, China

**\*Corresponding author:** Jian Li. Biomedicine Discovery Institute, Infection & Immunity Program and Department of Microbiology, 19 Innovation Walk, Monash University, Clayton Campus, Melbourne 3800, Australia. Telephone: +61 3 9903 9702. Facsimile: +61 3 9905 6450. Email: [jian.li@monash.edu](mailto:jian.li@monash.edu)

**The Supporting Information includes:**

**Pages S1-S11**

**Tables S1-S3**

**Figures S1-S6**

**Movies S1-S3**

**Table S1. Number of Ca<sup>2+</sup> bound to the outer leaflet of the outer membrane (OM).**

| <b>System</b>    | <b>Total number of bound Ca<sup>2+</sup></b> | <b>Number of bound Ca<sup>2+</sup> per lipid</b> |
|------------------|----------------------------------------------|--------------------------------------------------|
| Lipid A OM       | 60                                           | 1.82                                             |
| Lipid A-pEtN OM  | 48                                           | 1.45                                             |
| LPS-deficient OM | 19                                           | 0.24                                             |

**Table S2. Components of the outer membrane models.**

| <b>Outer membrane</b> | <b>Membrane composition</b>                                                                                      | <b>Lipid number</b>                                   | <b>Membrane size</b>           |
|-----------------------|------------------------------------------------------------------------------------------------------------------|-------------------------------------------------------|--------------------------------|
| Lipid A               | Outer leaflet: 75% lipid A, 18% POPE, 4% POPG, 3% PVCL2<br>Inner leaflet: 72% POPE, 16% POPG, 12% PVCL2          | Lipid A: 25<br>POPE: 60<br>POPG: 14<br>PVCL2: 11      | 7.6 nm × 7.6 nm<br>(x-y plane) |
| Lipid A-pEtN          | Outer leaflet: 75% lipid A-pEtN, 14.5% POPE, 6.5% POPG, 4% PVCL2<br>Inner leaflet: 58% POPE, 26% POPG, 16% PVCL2 | Lipid A-pEtN: 25<br>POPE: 48<br>POPG: 22<br>PVCL2: 14 | 7.7 nm × 7.7 nm<br>(x-y plane) |
| LPS-deficient         | Outer and inner leaflets: 64% POPE, 26% POPG, 10% PVCL2                                                          | POPE: 100<br>POPG: 40<br>PVCL2: 16                    | 7.6 nm × 7.6 nm<br>(x-y plane) |

POPE: phosphoethanolamine (16:0-18:1); POPG: phosphoglycerol (16:0-18:1); PVCL2: cardiolipin (16:0, 18:1-16:0, 18:1).

**Table S3. Details of molecular dynamics simulation systems.**

| <b>Outer membrane</b> | <b>System</b> | <b>Colistin number</b> | <b>Simulation method</b> | <b>Simulation length</b> |
|-----------------------|---------------|------------------------|--------------------------|--------------------------|
| Lipid A               | OM            | 0                      | Unconstrained MD         | 100 ns                   |
|                       | OM + colistin | 1                      | Steered MD               | 50 ns<br>(n = 3)         |
|                       | OM + colistin | 1                      | Umbrella sampling MD     | 50 ns<br>(×24 windows)   |
|                       | OM + colistin | 1                      | Umbrella sampling MD     | 50 ns<br>(×24 windows)   |
| Lipid A-pEtN          | OM            | 0                      | Unconstrained MD         | 100 ns                   |
|                       | OM + colistin | 1                      | Steered MD               | 50 ns<br>(n = 3)         |
|                       | OM + colistin | 1                      | Umbrella sampling MD     | 50 ns<br>(×24 windows)   |
|                       | OM + colistin | 1                      | Umbrella sampling MD     | 50 ns<br>(×24 windows)   |
| LPS-deficient         | OM            | 0                      | Unconstrained MD         | 100 ns                   |
|                       | OM + colistin | 1                      | Steered MD               | 50 ns<br>(n = 3)         |
|                       | OM + colistin | 1                      | Umbrella sampling MD     | 50 ns<br>(×28 windows)   |
|                       | OM + colistin | 1                      | Umbrella sampling MD     | 50 ns<br>(×28 windows)   |

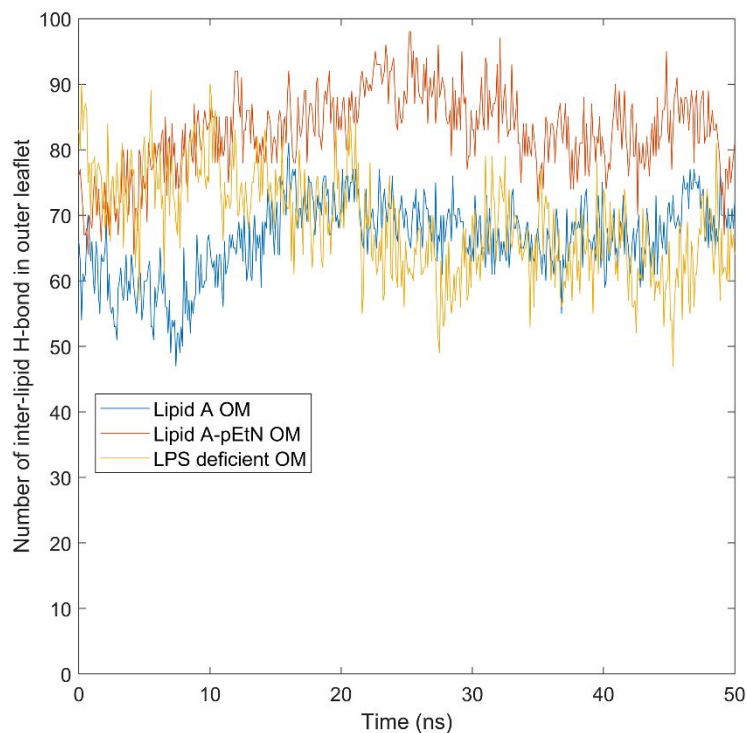

**Figure S1.** Changes in the number of the inter-lipid hydrogen bonds in different systems calculated based on the steered simulation trajectories. The colistin penetration decreased the intramolecular hydrogen bonds after approximately 18-ns, 10-ns and 25-ns simulations in the lipid A, lipid A-pEtN and LPS-deficient OM systems, respectively.

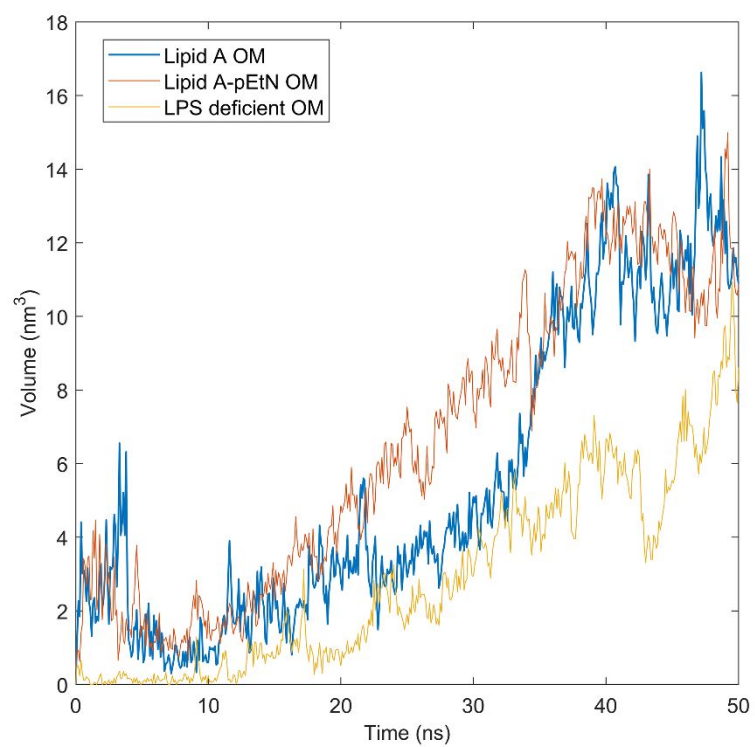

**Figure S2.** Changes in the volume of the water pores in different outer membrane systems calculated based on the steered simulation trajectories.

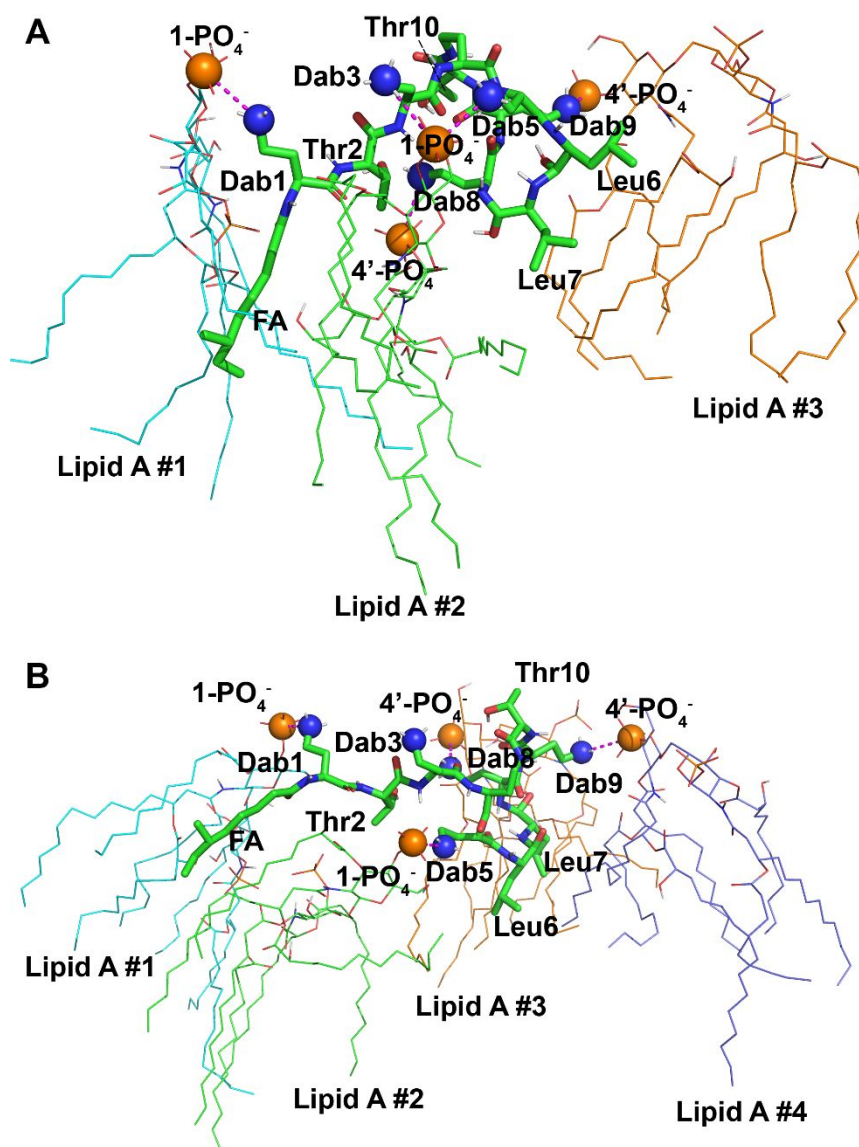

**Figure S3.** Interaction of colistin A with the lipid A OM. The results were calculated from the (A) first and (B) second steered simulation replicates in the lipid A OM system. The electrostatic interactions between the Dab residues and the lipid A phosphate groups are shown in purple dashed lines.

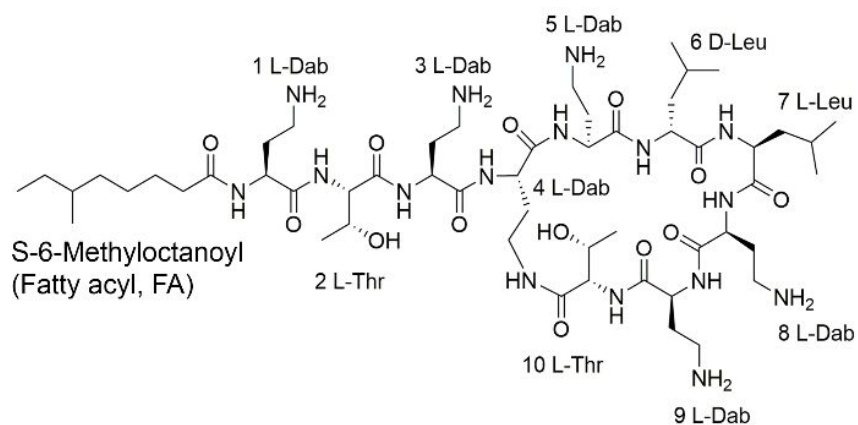

**Figure S4.** Chemical structure of colistin A. The colistin molecule consists of a cyclic heptapeptide, a linking tripeptide and an *N*-terminal fatty acyl group. The hydrophobic fatty acyl tail, Leu6 and Leu7, and the positively charged Dab residues (at positions 1, 3, 5, 8 and 9) confer the amphipathic nature.



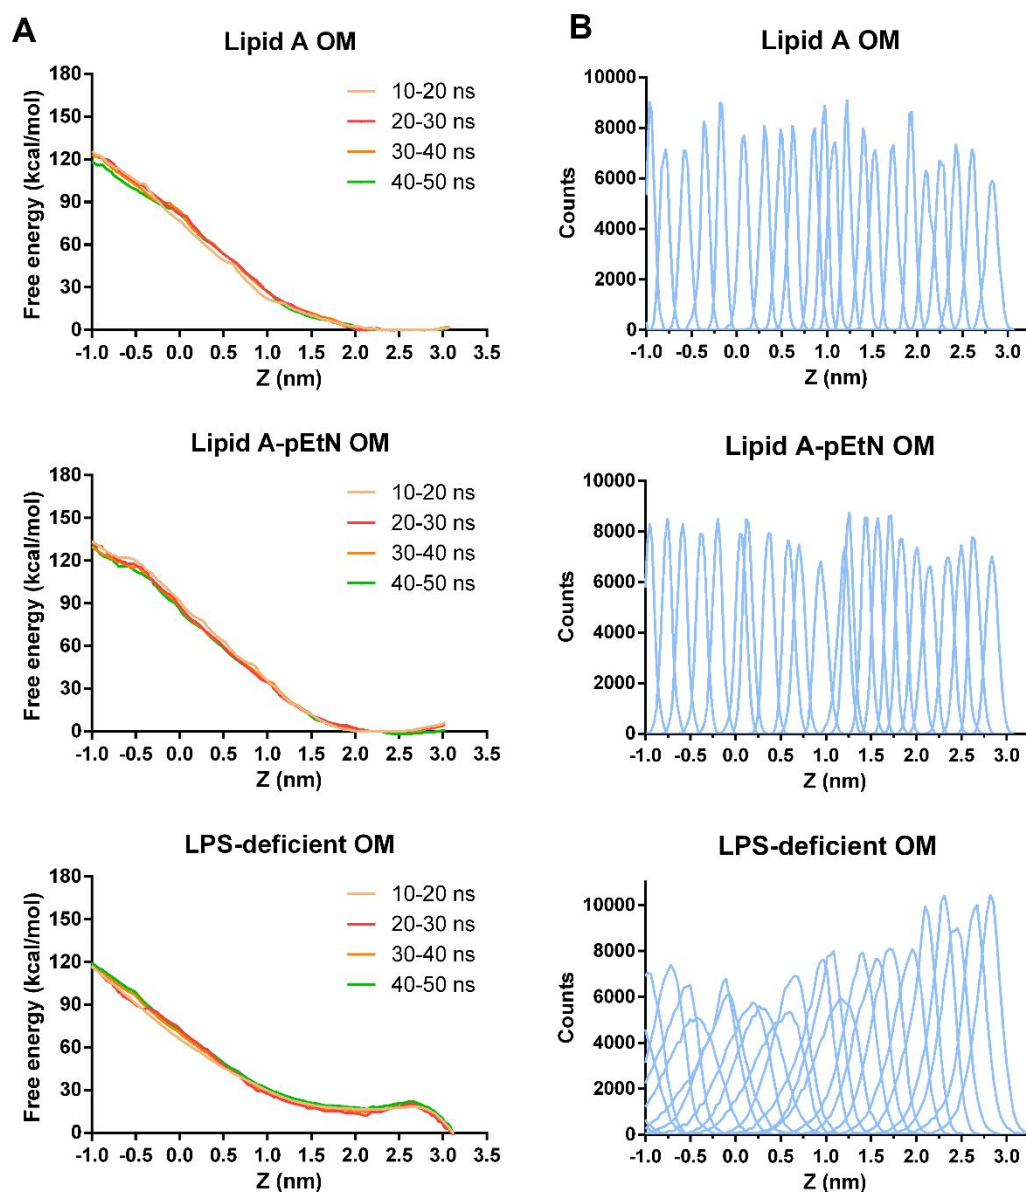

**Figure S5.** Free energy profiles (PMFs) calculated from 10-ns time blocks (A) and position distribution of colistin A in each umbrella sampling window (B). The minor variations between the PMFs from four time blocks and the overlap between adjacent windows indicate the convergence of free energy calculations.

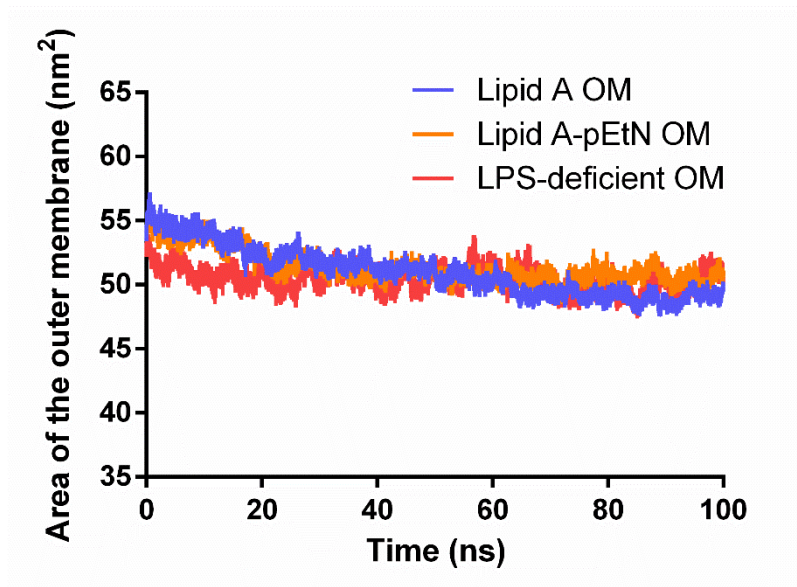

**Figure S6.** Surface area of the outer membrane (x-y plane) in the unrestrained molecular dynamics simulations.

**Movie S1.** Structural recovery of the lipid A outer membrane. The movie was prepared based on the simulation trajectory from the 24th umbrella sampling window.

**Movie S2.** Structural recovery of the lipid A-pEtN outer membrane. The movie was prepared based on the simulation trajectory from the 24th umbrella sampling window.

**Movie S3.** Structural recovery of the LPS-deficient outer membrane. The movie was prepared based on the simulation trajectory from the 28th umbrella sampling window.
